# Supplementary material for: Controversies and Clinical Applications of Non-Invasive Transspinal Magnetic Stimulation: A Critical Review and Exploratory Trial in Hereditary Spastic Paraplegia
Source: MDPI journal article supplement (doi:10.3390/jcm11164748), 2022-08-14
Supplement: s1 [file s1]

**Supplementary Table S1.** Relevant TsMS exploratory human studies.

| Study                             | Population                                                                 | Stimulation                                                    | Side effects      | Relevant findings and conclusions                                                                                                                                                                                                        |
|-----------------------------------|----------------------------------------------------------------------------|----------------------------------------------------------------|-------------------|------------------------------------------------------------------------------------------------------------------------------------------------------------------------------------------------------------------------------------------|
| <b>Barker et al 1987 [3]</b>      | 15 multiple sclerosis patient, 27 healthy controls, 5 motor neuron disease | Circular coil single pulse, over cervical column               | Minor discomfort  | It was not possible to stimulate descending tracts in the spinal cord but roots or plexus were reliably stimulated. Central conduction times could be assessed comparing M1 and peripheral stimulation                                   |
| <b>Ugawa et al 1989 [14]</b>      | 10 healthy controls                                                        | 9 cm circular coil at various levels C2 to S1, compared to TES | None              | No inferior limbs activity from cervical stimulation<br>Fixed EMG latency when moving coil compatible with Spinal root activation. Overall similar latencies to TES. Maximum root activation when current flows outwards at the foramina |
| <b>Similowski et al 1989 [21]</b> | 6 healthy controls                                                         | 9 cm circular coil at C7 single pulses                         | None              | Reliable diaphragmatic CMAP, probably by nerve trunk or roots activation<br>No detection of activity in lower muscles<br>TsMS can easily and safely stimulate phrenic nerves                                                             |
| <b>Cros 1990 [19]</b>             | 21 healthy controls                                                        | 9 cm coil at C3-6                                              | None              | CMAP latencies were comparable to F waves for biceps and triceps and shorter than TES elicited. No descending tract stimulation.<br>TsMS can stimulate motor roots exiting the spinal cord or anterior horn itself                       |
| <b>Britton 1990 [18]</b>          | 5 healthy controls                                                         | 12 cm circular coil at C6/7, C4/5, L2 and S3                   | None              | Reliable CMAPs from roots exiting targeted levels with shorter latencies than F waves<br>Supramaximal responses could not be obtained.<br>No supramaximal response was obtained                                                          |
| <b>Chokroverty 1991 [15]</b>      | 8 healthy controls and 4 patients with neck pain                           | 9.2 cm circular coil at C7                                     | None              | TsMS latencies were consistent despite coil position and intensity, latencies were always shorter latencies than F waves.<br>TsMS would elicit CMAP around 2.7 cm from the anterior horn at cervical level.                              |
| <b>Zwarts 93 [20]</b>             | 7 healthy controls                                                         | 7.5 cm circular coil at low cervical column                    | None              | Sensory potentials can be elicited by TsMS. Stimulation site appears to be near the spinal foramina<br>Proximal retrograde sensory conduction can also be measured with TsMS                                                             |
| <b>Chokroverty 1993 [17]</b>      | 11 healthy controls, 11 patients with low back pain                        | 9.2C cm circular coil at L5 or S1                              | None              | TsMS would elicit CMAP around 20 cm from the spinal motor neuron at L5-S1 roots.<br>TsMS over lumbosacral spine stimulates roots before exiting neuroforamina                                                                            |
| <b>Ugawa 1994 [23]</b>            | 7 healthy controls                                                         | Double cone at inion                                           | Slight discomfort | Descending corticospinal tract can be stimulated by magnetic stimulation at the foramen magnum as stimulation could elicit consistent tibialis anterior CMAPs                                                                            |
| <b>Chokroverty 1995 [16]</b>      | 12 healthy controls and 1 patient with                                     | 9.2 cm circular coil at T7-9                                   | None              | TsMS latencies were consistent despite coil position and intensity and prolonged in the diabetic patient. No supramaximal response was achieved.                                                                                         |

|                         |             |                |                      |                                                                 |      |                                                                                                                                                                                                                                                                                                                                 |
|-------------------------|-------------|----------------|----------------------|-----------------------------------------------------------------|------|---------------------------------------------------------------------------------------------------------------------------------------------------------------------------------------------------------------------------------------------------------------------------------------------------------------------------------|
|                         |             |                | diabetes<br>mellitus |                                                                 |      |                                                                                                                                                                                                                                                                                                                                 |
| <b>Tomberg [27]</b>     | <b>1995</b> | 4<br>controls  | healthy              | Circular coil<br>at C7 and up<br>to 8 cm above<br>single pulses | None | Multisynaptic motor activation may have been achieved either by corticospinal or propriospinal systems.<br>Abductor pollicis brevis (C8-T2) EMG size and latency compatible Spinal root activation at C7 up to 4 cm above.<br>Smaller EMG with 1.5-2.5ms longer latency when 6 or 8cm above.                                    |
| <b>Paxton 2010 [22]</b> |             | 23<br>controls | healthy              | Figure of<br>eight coil at<br>100% (3.5<br>Tesla) over<br>C6-7  | None | Sympathetic ganglia could not be stimulated. No cardiovascular changes from intense TsMS in healthy subjects.<br>TsMS was unable to elicit any descending tract response nor alter sympathetic activity                                                                                                                         |
| <b>Ruiu 2021 [28]</b>   |             | 18<br>controls | healthy              | 90 mm<br>Circular coil<br>over T2-T3.                           | None | Resting motor threshold was lower and peak amplitudes were higher when induced current was better aligned to a flowing out the studied spinal foramina<br>No lower limb response was elicited even at 200% resting motor threshold.<br>CMAP produced by TsMS is compatible with mixed nerve stimulation at very proximal sites. |

cm: centimeter; CMAP: compound muscle action potential; EMG: needle electromyography; mm: milimeter;

TES: transcranial electric stimulation; TsMS: transpinal magnetic stimulation
